# Supplementary material for: Chronic myeloid leukemia incidence, survival and accessibility of tyrosine kinase inhibitors: a report from population-based Lithuanian haematological disease registry 2000–2013
Source: PubMed Central journal article supplement (PMC4782571; doi:10.1186/s12885-016-2238-9), 2016-03-08
Supplement: 12885_2016_2238_MOESM1_ESM.pdf [file 12885_2016_2238_MOESM1_ESM.pdf]

# Chronic myeloid leukemia incidence, survival and accessibility of tyrosine kinase inhibitors: a report from population-based Lithuanian haematological disease registry 2000-2013

Tomas Beinortas, Ilma Tavorienė, Tadas Žvirblis, Rolandas Gerbutavičius, Mindaugas Jurgutis, Laimonas Griškevičius

## Supplement

### Lithuanian HESS registry

Lithuania has a national haematological disease monitoring system (HESS), which collects data from 2000 and covers the entire country, with a population of 3 million. Patients with haematological malignancies are managed in 5 centres across the country and all physicians and pathologists are obliged to report all newly diagnosed CML cases to HESS Registry. HESS contains data on age, sex, ICD-10 code, date of diagnosis, clinical symptoms, laboratory test, risk group, treatment, Ph and BCR-ABL status (both mandatory from 2010) of CML. Through unique personal ID, HESS is also linked to the national death registry, which allows further validation of data. All Lithuanians are covered by national healthcare insurance and haematological diseases are treated in public healthcare system. Therefore underreporting to HESS registry is unlikely. All patients, who were diagnosed with CML (ICD-10 code 92.1) between January 1st 2000 and December 31st 2013, were entered into the study. There was no age restriction or other exclusion criteria.

### Statistical methods

Crude and age standardize rates according to world population (CR and ASR (W), respectively) were calculated for incidence, prevalence and mortality. CR was represented as the number of patients per 100 000 inhabitants per year in Lithuania [1]. ASR (W) was defined as a weighted mean of the age-specific rates [2]; the weights were taken from the standard world population [3]. Incidence rate was defined as the number of new CML cases that occurred during a given time period [1]. Mortality rate was defined as a number of deaths from any cause during a given time period [1].

Relative survival rate (RSR) was defined as observed survival in CML group divided by the expected survival of a comparable group from general population [4]. One-, five- and ten-year RSRs with 95% confidence intervals (95% CI) were estimated. Survival time was calculated as the time from the date of diagnosis to death; 31st of December 2014 was set as censoring date for alive patients.

Survival trends were evaluated by Kaplan-Meier method. Log-rank test was used evaluate statistical difference between Kaplan-Meier curves.

All statistics were performed by Statistical Analysis System (SAS) package version 9.2. A two-tailed p-value less than 0.05 was considered significant.

**Table S1.** Incidence Crude Rate of Chronic Myeloid Leukemia according to age group (per 100 000 per year) (10 age groups).

| Age groups                 | Age group, years |             |             |             |             |             |             |             |             |             | Overall     |
|----------------------------|------------------|-------------|-------------|-------------|-------------|-------------|-------------|-------------|-------------|-------------|-------------|
|                            | 0-14             | 15-39       | 40-44       | 45-49       | 50-54       | 55-59       | 60-64       | 65-69       | 70-74       | 75+         |             |
| <b>All population</b>      |                  |             |             |             |             |             |             |             |             |             |             |
| <b>2000</b>                | 0.00             | 0.31        | 0.74        | 1.37        | 2.03        | 2.18        | 2.18        | 4.18        | 4.83        | 5.89        | <b>1.31</b> |
| <b>2001</b>                | 0.00             | 0.95        | 1.87        | 0.46        | 2.54        | 2.74        | 3.28        | 3.60        | 8.32        | 4.31        | <b>1.72</b> |
| <b>2002</b>                | 0.00             | 0.48        | 0.73        | 0.45        | 1.48        | 1.72        | 2.18        | 4.81        | 4.81        | 4.65        | <b>1.24</b> |
| <b>2003</b>                | 0.16             | 0.88        | 2.19        | 1.74        | 0.49        | 4.09        | 2.75        | 6.65        | 6.20        | 8.37        | <b>2.08</b> |
| <b>2004</b>                | 0.00             | 0.40        | 2.20        | 0.41        | 2.43        | 1.14        | 0.56        | 2.41        | 4.86        | 5.30        | <b>1.22</b> |
| <b>Average (2000-2004)</b> | <b>0.03</b>      | <b>0.60</b> | <b>1.55</b> | <b>0.89</b> | <b>1.79</b> | <b>2.37</b> | <b>2.19</b> | <b>4.33</b> | <b>5.80</b> | <b>5.70</b> | <b>1.51</b> |
| <b>2005</b>                | 0.00             | 0.40        | 0.74        | 0.80        | 0.97        | 2.78        | 0.58        | 2.42        | 3.48        | 5.71        | <b>1.11</b> |
| <b>2006</b>                | 0.18             | 0.73        | 1.15        | 2.32        | 1.92        | 1.63        | 0.59        | 4.87        | 4.18        | 2.77        | <b>1.38</b> |
| <b>2007</b>                | 0.19             | 0.32        | 0.39        | 1.89        | 2.35        | 1.58        | 3.72        | 3.66        | 4.88        | 6.28        | <b>1.54</b> |
| <b>2008</b>                | 0.00             | 0.98        | 0.40        | 1.13        | 1.82        | 1.56        | 3.18        | 1.84        | 0.70        | 5.24        | <b>1.31</b> |
| <b>2009</b>                | 0.00             | 0.41        | 0.00        | 1.14        | 0.87        | 1.04        | 1.25        | 3.15        | 2.80        | 3.42        | <b>0.93</b> |
| <b>Average (2005-2009)</b> | <b>0.07</b>      | <b>0.57</b> | <b>0.54</b> | <b>1.46</b> | <b>1.59</b> | <b>1.72</b> | <b>1.86</b> | <b>3.19</b> | <b>3.21</b> | <b>4.68</b> | <b>1.25</b> |
| <b>2010</b>                | 0.00             | 0.43        | 0.84        | 2.34        | 0.00        | 2.08        | 1.83        | 2.59        | 1.40        | 2.52        | <b>0.97</b> |
| <b>2011</b>                | 0.00             | 0.90        | 1.38        | 0.88        | 1.28        | 1.62        | 2.42        | 0.68        | 1.39        | 3.15        | <b>1.16</b> |
| <b>2012</b>                | 0.00             | 0.72        | 1.40        | 0.91        | 1.68        | 2.65        | 1.77        | 2.15        | 6.28        | 1.93        | <b>1.37</b> |
| <b>2013</b>                | 0.00             | 0.42        | 0.95        | 0.47        | 0.42        | 1.53        | 0.58        | 0.73        | 0.71        | 1.51        | <b>0.61</b> |
| <b>Average (2010-2013)</b> | <b>0.00</b>      | <b>0.62</b> | <b>1.14</b> | <b>1.15</b> | <b>0.85</b> | <b>1.97</b> | <b>1.65</b> | <b>1.54</b> | <b>2.45</b> | <b>2.28</b> | <b>1.03</b> |
| <b>Average (2000-2013)</b> | <b>0.04</b>      | <b>0.59</b> | <b>1.07</b> | <b>1.16</b> | <b>1.45</b> | <b>2.02</b> | <b>1.92</b> | <b>3.12</b> | <b>3.92</b> | <b>4.36</b> | <b>1.28</b> |
| <b>Males</b>               |                  |             |             |             |             |             |             |             |             |             |             |
| <b>2000</b>                | 0.00             | 0.16        | 0.77        | 0.96        | 4.42        | 3.72        | 3.89        | 9.07        | 5.72        | 7.49        | <b>1.59</b> |
| <b>2001</b>                | 0.00             | 0.47        | 2.33        | 0.97        | 3.33        | 2.49        | 5.21        | 3.04        | 17.26       | 7.54        | <b>1.90</b> |
| <b>2002</b>                | 0.00             | 0.47        | 0.00        | 0.95        | 1.08        | 1.30        | 1.30        | 9.15        | 3.77        | 5.42        | <b>1.11</b> |
| <b>2003</b>                | 0.00             | 1.43        | 3.77        | 2.74        | 0.00        | 3.98        | 2.62        | 10.75       | 5.67        | 13.69       | <b>2.48</b> |
| <b>2004</b>                | 0.00             | 0.48        | 2.27        | 0.00        | 3.17        | 2.60        | 0.00        | 4.61        | 9.53        | 8.35        | <b>1.50</b> |
| <b>Average (2000-2004)</b> | <b>0.00</b>      | <b>0.60</b> | <b>1.83</b> | <b>1.12</b> | <b>2.40</b> | <b>2.82</b> | <b>2.60</b> | <b>7.32</b> | <b>8.39</b> | <b>8.50</b> | <b>1.72</b> |
| <b>2005</b>                | 0.00             | 0.48        | 0.76        | 0.84        | 1.05        | 2.53        | 1.38        | 3.08        | 3.84        | 8.21        | <b>1.13</b> |
| <b>2006</b>                | 0.00             | 0.48        | 1.57        | 2.46        | 2.07        | 1.23        | 0.00        | 3.11        | 5.79        | 4.75        | <b>1.20</b> |
| <b>2007</b>                | 0.37             | 0.64        | 0.00        | 2.40        | 3.06        | 2.39        | 4.47        | 7.81        | 11.61       | 9.22        | <b>2.10</b> |
| <b>2008</b>                | 0.00             | 1.13        | 0.82        | 0.79        | 1.98        | 1.18        | 3.05        | 3.15        | 0.00        | 5.98        | <b>1.28</b> |
| <b>2009</b>                | 0.00             | 0.65        | 0.00        | 2.39        | 0.00        | 1.17        | 1.51        | 4.87        | 1.95        | 7.33        | <b>1.16</b> |
| <b>Average (2005-2009)</b> | <b>0.07</b>      | <b>0.68</b> | <b>0.63</b> | <b>1.78</b> | <b>1.63</b> | <b>1.70</b> | <b>2.08</b> | <b>4.40</b> | <b>4.64</b> | <b>7.10</b> | <b>1.37</b> |
| <b>2010</b>                | 0.00             | 0.51        | 0.86        | 0.82        | 0.00        | 2.34        | 1.47        | 3.33        | 3.92        | 7.20        | <b>1.11</b> |
| <b>2011</b>                | 0.00             | 1.39        | 1.91        | 0.91        | 0.92        | 1.20        | 2.87        | 1.75        | 0.00        | 4.04        | <b>1.29</b> |
| <b>2012</b>                | 0.00             | 0.41        | 1.94        | 0.95        | 1.80        | 2.36        | 2.79        | 1.83        | 9.60        | 2.63        | <b>1.38</b> |
| <b>2013</b>                | 0.00             | 0.83        | 0.99        | 0.00        | 0.00        | 1.13        | 1.38        | 1.86        | 1.95        | 3.87        | <b>0.88</b> |
| <b>Average (2010-2013)</b> | <b>0.00</b>      | <b>0.79</b> | <b>1.43</b> | <b>0.67</b> | <b>0.68</b> | <b>1.76</b> | <b>2.13</b> | <b>2.19</b> | <b>3.87</b> | <b>4.44</b> | <b>1.17</b> |

|                                     |             |             |             |             |             |             |             |             |             |             |             |
|-------------------------------------|-------------|-------------|-------------|-------------|-------------|-------------|-------------|-------------|-------------|-------------|-------------|
| <b>Average<br/>(2000-<br/>2013)</b> | <b>0.03</b> | <b>0.68</b> | <b>1.29</b> | <b>1.23</b> | <b>1.64</b> | <b>2.12</b> | <b>2.28</b> | <b>4.82</b> | <b>5.76</b> | <b>6.84</b> | <b>1.44</b> |
| <b>Females</b>                      |             |             |             |             |             |             |             |             |             |             |             |
| <b>2000</b>                         | 0.00        | 0.47        | 0.72        | 1.74        | 0.00        | 0.97        | 0.94        | 0.99        | 4.32        | 5.26        | <b>1.07</b> |
| <b>2001</b>                         | 0.00        | 1.43        | 1.44        | 0.00        | 1.88        | 2.93        | 1.89        | 3.96        | 3.26        | 3.02        | <b>1.56</b> |
| <b>2002</b>                         | 0.00        | 0.48        | 1.41        | 0.00        | 1.83        | 2.04        | 2.82        | 1.98        | 5.41        | 4.34        | <b>1.35</b> |
| <b>2003</b>                         | 0.33        | 0.32        | 0.70        | 0.83        | 0.90        | 4.18        | 2.84        | 3.98        | 6.50        | 6.22        | <b>1.74</b> |
| <b>2004</b>                         | 0.00        | 0.32        | 2.13        | 0.79        | 1.80        | 0.00        | 0.97        | 0.99        | 2.18        | 4.06        | <b>0.98</b> |
| <b>Average<br/>(2000-<br/>2004)</b> | <b>0.07</b> | <b>0.60</b> | <b>1.28</b> | <b>0.67</b> | <b>1.28</b> | <b>2.02</b> | <b>1.89</b> | <b>2.38</b> | <b>4.33</b> | <b>4.58</b> | <b>1.34</b> |
| <b>2005</b>                         | 0.00        | 0.32        | 0.72        | 0.76        | 0.90        | 2.98        | 0.00        | 1.99        | 3.28        | 4.68        | 1.10        |
| <b>2006</b>                         | 0.37        | 0.98        | 0.75        | 2.20        | 1.78        | 1.94        | 1.02        | 6.00        | 3.27        | 1.95        | 1.55        |
| <b>2007</b>                         | 0.00        | 0.00        | 0.77        | 1.44        | 1.75        | 0.94        | 3.19        | 1.00        | 1.09        | 5.06        | 1.05        |
| <b>2008</b>                         | 0.00        | 0.82        | 0.00        | 1.43        | 1.69        | 1.86        | 3.28        | 1.01        | 1.09        | 4.93        | 1.34        |
| <b>2009</b>                         | 0.00        | 0.17        | 0.00        | 0.00        | 1.62        | 0.93        | 1.07        | 2.06        | 3.27        | 1.81        | 0.73        |
| <b>Average<br/>(2005-<br/>2009)</b> | <b>0.07</b> | <b>0.46</b> | <b>0.45</b> | <b>1.17</b> | <b>1.55</b> | <b>1.73</b> | <b>1.71</b> | <b>2.41</b> | <b>2.40</b> | <b>3.69</b> | <b>1.15</b> |
| <b>2010</b>                         | 0.00        | 0.35        | 0.81        | 3.75        | 0.00        | 1.87        | 2.08        | 2.12        | 0.00        | 0.59        | 0.85        |
| <b>2011</b>                         | 0.00        | 0.40        | 0.89        | 0.84        | 1.60        | 1.95        | 2.09        | 0.00        | 2.18        | 2.79        | 1.04        |
| <b>2012</b>                         | 0.00        | 1.04        | 0.90        | 0.87        | 1.57        | 2.88        | 1.02        | 2.35        | 4.38        | 1.63        | 1.37        |
| <b>2013</b>                         | 0.00        | 0.00        | 0.92        | 0.89        | 0.79        | 1.85        | 0.00        | 0.00        | 0.00        | 0.54        | 0.38        |
| <b>Average<br/>(2010-<br/>2013)</b> | <b>0.00</b> | <b>0.45</b> | <b>0.88</b> | <b>1.59</b> | <b>0.99</b> | <b>2.14</b> | <b>1.30</b> | <b>1.12</b> | <b>1.64</b> | <b>1.39</b> | <b>0.91</b> |
| <b>Average<br/>(2000-<br/>2013)</b> | <b>0.05</b> | <b>0.51</b> | <b>0.87</b> | <b>1.11</b> | <b>1.29</b> | <b>1.95</b> | <b>1.66</b> | <b>2.03</b> | <b>2.87</b> | <b>3.35</b> | <b>1.15</b> |

**Table S2.** Incidence Crude Rate of Chronic Myeloid Leukemia according to age group (per 100 000 per year) (5 age groups).

| Age groups            | Age group, years |             |             |             |             | Overall     |
|-----------------------|------------------|-------------|-------------|-------------|-------------|-------------|
|                       | 0-17             | 18-45       | 46-60       | 61-75       | 76+         |             |
| <b>All population</b> |                  |             |             |             |             |             |
| 2000                  | 0.12             | 0.42        | 1.71        | 3.77        | 6.85        | <b>1.31</b> |
| 2001                  | 0.00             | 1.21        | 2.04        | 5.05        | 4.13        | <b>1.72</b> |
| 2002                  | 0.00             | 0.57        | 1.19        | 4.00        | 5.08        | <b>1.24</b> |
| 2003                  | 0.13             | 1.28        | 2.02        | 5.46        | 8.09        | <b>2.08</b> |
| 2004                  | 0.00             | 0.78        | 1.32        | 2.74        | 5.27        | <b>1.22</b> |
| Average (2000-2004)   | <b>0.05</b>      | <b>0.85</b> | <b>1.66</b> | <b>4.20</b> | <b>5.88</b> | <b>1.51</b> |
| 2005                  | 0.14             | 0.43        | 1.45        | 2.13        | 6.23        | <b>1.11</b> |
| 2006                  | 0.14             | 0.93        | 2.05        | 3.25        | 2.51        | <b>1.38</b> |
| 2007                  | 0.15             | 0.58        | 1.85        | 3.95        | 6.34        | <b>1.54</b> |
| 2008                  | 0.15             | 1.02        | 1.21        | 2.00        | 5.69        | <b>1.31</b> |
| 2009                  | 0.16             | 0.29        | 1.04        | 2.70        | 3.24        | <b>0.93</b> |
| Average (2005-2009)   | <b>0.15</b>      | <b>0.65</b> | <b>1.52</b> | <b>2.81</b> | <b>4.80</b> | <b>1.25</b> |
| 2010                  | 0.00             | 0.52        | 1.66        | 2.04        | 2.23        | <b>0.97</b> |
| 2011                  | 0.18             | 0.96        | 1.41        | 1.81        | 2.55        | <b>1.16</b> |
| 2012                  | 0.18             | 0.89        | 1.72        | 3.18        | 2.08        | <b>1.37</b> |
| 2013                  | 0.19             | 0.45        | 0.78        | 0.68        | 1.68        | <b>0.61</b> |
| Average (2010-2013)   | <b>0.14</b>      | <b>0.71</b> | <b>1.39</b> | <b>1.93</b> | <b>2.14</b> | <b>1.03</b> |
| Average (2000-2013)   | <b>0.11</b>      | <b>0.74</b> | <b>1.53</b> | <b>3.06</b> | <b>4.43</b> | <b>1.28</b> |
| <b>Male</b>           |                  |             |             |             |             |             |
| 2000                  | 0.00             | 0.29        | 3.01        | 6.47        | 8.57        | <b>1.59</b> |
| 2001                  | 0.00             | 0.86        | 2.61        | 8.05        | 6.38        | <b>1.90</b> |
| 2002                  | 0.00             | 0.43        | 1.11        | 4.81        | 6.14        | <b>1.11</b> |
| 2003                  | 0.00             | 2.15        | 1.84        | 7.48        | 11.69       | <b>2.48</b> |
| 2004                  | 0.00             | 0.86        | 1.80        | 4.31        | 9.46        | <b>1.50</b> |
| Average (2000-2004)   | <b>0.00</b>      | <b>0.92</b> | <b>2.07</b> | <b>6.22</b> | <b>8.45</b> | <b>1.72</b> |
| 2005                  | 0.27             | 0.43        | 1.41        | 2.73        | 9.30        | <b>1.13</b> |
| 2006                  | 0.00             | 0.72        | 2.06        | 3.34        | 3.57        | <b>1.20</b> |
| 2007                  | 0.29             | 0.87        | 2.02        | 7.94        | 10.38       | <b>2.10</b> |
| 2008                  | 0.29             | 1.17        | 0.99        | 2.30        | 6.72        | <b>1.28</b> |
| 2009                  | 0.30             | 0.44        | 1.29        | 2.90        | 8.20        | <b>1.16</b> |
| Average (2005-2009)   | <b>0.23</b>      | <b>0.73</b> | <b>1.55</b> | <b>3.84</b> | <b>7.63</b> | <b>1.37</b> |
| 2010                  | 0.00             | 0.60        | 0.95        | 3.48        | 6.30        | <b>1.11</b> |
| 2011                  | 0.34             | 1.40        | 1.01        | 1.74        | 4.49        | <b>1.29</b> |
| 2012                  | 0.00             | 0.72        | 2.02        | 4.07        | 2.92        | <b>1.38</b> |
| 2013                  | 0.36             | 0.73        | 0.34        | 1.75        | 4.38        | <b>0.88</b> |
| Average (2010-2013)   | <b>0.18</b>      | <b>0.86</b> | <b>1.08</b> | <b>2.76</b> | <b>4.52</b> | <b>1.17</b> |
| Average (2000-2013)   | <b>0.13</b>      | <b>0.83</b> | <b>1.61</b> | <b>4.38</b> | <b>7.04</b> | <b>1.44</b> |
| <b>Female</b>         |                  |             |             |             |             |             |

|                     |      |      |      |      |      |      |
|---------------------|------|------|------|------|------|------|
| 2000                | 0.24 | 0.56 | 0.63 | 2.06 | 6.15 | 1.07 |
| 2001                | 0.00 | 1.54 | 1.56 | 3.12 | 3.27 | 1.56 |
| 2002                | 0.00 | 0.70 | 1.25 | 3.47 | 4.68 | 1.35 |
| 2003                | 0.26 | 0.42 | 2.18 | 4.15 | 6.71 | 1.74 |
| 2004                | 0.00 | 0.70 | 0.92 | 1.73 | 3.65 | 0.98 |
| Average (2000-2004) | 0.10 | 0.78 | 1.31 | 2.91 | 4.89 | 1.34 |
| 2005                | 0.00 | 0.43 | 1.49 | 1.75 | 5.04 | 1.10 |
| 2006                | 0.29 | 1.14 | 2.05 | 3.19 | 2.10 | 1.55 |
| 2007                | 0.00 | 0.29 | 1.71 | 1.43 | 4.76 | 1.05 |
| 2008                | 0.00 | 0.87 | 1.40 | 1.82 | 5.29 | 1.34 |
| 2009                | 0.00 | 0.15 | 0.83 | 2.56 | 1.29 | 0.73 |
| Average (2005-2009) | 0.06 | 0.58 | 1.50 | 2.15 | 3.70 | 1.15 |
| 2010                | 0.00 | 0.45 | 2.29 | 1.11 | 0.62 | 0.85 |
| 2011                | 0.00 | 0.52 | 1.75 | 1.86 | 1.78 | 1.04 |
| 2012                | 0.37 | 1.07 | 1.46 | 2.61 | 1.74 | 1.37 |
| 2013                | 0.00 | 0.18 | 1.16 | 0.00 | 0.59 | 0.38 |
| Average (2010-2013) | 0.09 | 0.56 | 1.67 | 1.40 | 1.18 | 0.91 |
| Average (2000-2013) | 0.08 | 0.64 | 1.48 | 2.20 | 3.41 | 1.15 |

**Table S3.** Incidence ASR (W) of Chronic Myeloid Leukemia (per 100 000 per year).

| Overall             | All population | Males | Females |
|---------------------|----------------|-------|---------|
| 2000                | 0.82           | 1.05  | 0.67    |
| 2001                | 1.19           | 1.30  | 1.18    |
| 2002                | 0.79           | 0.77  | 0.83    |
| 2003                | 1.40           | 1.83  | 1.05    |
| 2004                | 0.80           | 1.05  | 0.63    |
| Average (2000-2004) | 1.00           | 1.20  | 0.87    |
| 2005                | 0.72           | 0.80  | 0.66    |
| 2006                | 1.02           | 0.87  | 1.17    |
| 2007                | 0.99           | 1.50  | 0.59    |
| 2008                | 0.96           | 1.02  | 0.91    |
| 2009                | 0.60           | 0.83  | 0.42    |
| Average (2005-2009) | 0.86           | 1.00  | 0.75    |
| 2010                | 0.69           | 0.79  | 0.65    |
| 2011                | 0.87           | 1.09  | 0.67    |
| 2012                | 0.96           | 0.95  | 1.01    |
| 2013                | 0.46           | 0.69  | 0.27    |
| Average (2010-2013) | 0.75           | 0.88  | 0.65    |
| Overall             | 0.88           | 1.04  | 0.76    |

**Table S4.** Mortality Crude Rate of Chronic Myeloid Leukemia according to age group (per 100 000 per year).

| Age groups                 | Age group, years |             |             |             |             |             |             |             |             |             | Overall     |
|----------------------------|------------------|-------------|-------------|-------------|-------------|-------------|-------------|-------------|-------------|-------------|-------------|
|                            | 0-14             | 15-39       | 40-44       | 45-49       | 50-54       | 55-59       | 60-64       | 65-69       | 70-74       | 75+         |             |
| <b>All population</b>      |                  |             |             |             |             |             |             |             |             |             |             |
| <b>2000</b>                | 0.00             | 0.00        | 0.00        | 0.00        | 0.51        | 0.00        | 0.54        | 1.19        | 1.38        | 1.61        | <b>0.26</b> |
| <b>2001</b>                | 0.00             | 0.24        | 0.00        | 0.00        | 0.00        | 1.10        | 2.74        | 3.60        | 8.32        | 3.23        | <b>0.98</b> |
| <b>2002</b>                | 0.00             | 0.08        | 0.37        | 0.00        | 0.99        | 0.57        | 0.00        | 4.21        | 2.75        | 4.65        | <b>0.72</b> |
| <b>2003</b>                | 0.00             | 0.32        | 0.00        | 0.87        | 0.98        | 0.58        | 2.20        | 3.02        | 4.13        | 6.40        | <b>1.07</b> |
| <b>2004</b>                | 0.00             | 0.24        | 0.37        | 0.00        | 0.97        | 3.43        | 1.13        | 1.21        | 3.47        | 7.71        | <b>1.08</b> |
| <b>Average (2000-2004)</b> | <b>0.00</b>      | <b>0.18</b> | <b>0.15</b> | <b>0.17</b> | <b>0.69</b> | <b>1.14</b> | <b>1.32</b> | <b>2.65</b> | <b>4.01</b> | <b>4.72</b> | <b>0.82</b> |
| <b>2005</b>                | 0.17             | 0.08        | 0.74        | 0.40        | 0.00        | 1.11        | 2.31        | 4.83        | 2.79        | 3.33        | <b>0.88</b> |
| <b>2006</b>                | 0.00             | 0.24        | 0.76        | 0.39        | 0.48        | 0.54        | 1.19        | 0.00        | 3.48        | 2.77        | <b>0.62</b> |
| <b>2007</b>                | 0.19             | 0.40        | 1.57        | 0.38        | 0.94        | 2.11        | 1.24        | 1.83        | 3.49        | 3.14        | <b>1.01</b> |
| <b>2008</b>                | 0.00             | 0.33        | 0.00        | 1.50        | 0.91        | 1.04        | 0.64        | 1.84        | 3.50        | 5.24        | <b>0.98</b> |
| <b>2009</b>                | 0.00             | 0.00        | 0.41        | 0.00        | 0.44        | 1.04        | 1.88        | 1.89        | 1.40        | 3.85        | <b>0.63</b> |
| <b>Average (2005-2009)</b> | <b>0.07</b>      | <b>0.21</b> | <b>0.70</b> | <b>0.53</b> | <b>0.55</b> | <b>1.17</b> | <b>1.45</b> | <b>2.08</b> | <b>2.93</b> | <b>3.67</b> | <b>0.82</b> |
| <b>2010</b>                | 0.00             | 0.09        | 0.42        | 0.78        | 1.69        | 0.52        | 0.00        | 3.24        | 2.10        | 5.46        | <b>0.91</b> |
| <b>2011</b>                | 0.00             | 0.10        | 0.92        | 0.44        | 0.00        | 0.54        | 1.21        | 2.05        | 4.16        | 2.76        | <b>0.76</b> |
| <b>2012</b>                | 0.00             | 0.10        | 0.00        | 0.00        | 0.00        | 0.53        | 1.18        | 1.43        | 2.79        | 3.47        | <b>0.64</b> |
| <b>2013</b>                | 0.00             | 0.10        | 1.43        | 0.00        | 0.00        | 0.00        | 0.58        | 1.46        | 0.71        | 1.89        | <b>0.44</b> |
| <b>Average (2010-2013)</b> | <b>0.00</b>      | <b>0.10</b> | <b>0.69</b> | <b>0.31</b> | <b>0.42</b> | <b>0.40</b> | <b>0.74</b> | <b>2.05</b> | <b>2.44</b> | <b>3.40</b> | <b>0.69</b> |
| <b>Average (2000-2013)</b> | <b>0.03</b>      | <b>0.17</b> | <b>0.50</b> | <b>0.34</b> | <b>0.56</b> | <b>0.94</b> | <b>1.20</b> | <b>2.27</b> | <b>3.18</b> | <b>3.96</b> | <b>0.78</b> |
| <b>Males</b>               |                  |             |             |             |             |             |             |             |             |             |             |
| <b>2000</b>                | 0.00             | 0.00        | 0.00        | 0.00        | 1.10        | 0.00        | 0.00        | 3.02        | 1.91        | 3.75        | <b>0.37</b> |
| <b>2001</b>                | 0.00             | 0.16        | 0.00        | 0.00        | 0.00        | 1.25        | 5.21        | 3.04        | 17.26       | 5.65        | <b>1.23</b> |
| <b>2002</b>                | 0.00             | 0.16        | 0.76        | 0.00        | 2.16        | 0.00        | 0.00        | 9.15        | 1.89        | 7.23        | <b>0.93</b> |
| <b>2003</b>                | 0.00             | 0.16        | 0.00        | 0.00        | 1.06        | 0.00        | 5.23        | 7.68        | 5.67        | 10.26       | <b>1.24</b> |
| <b>2004</b>                | 0.00             | 0.32        | 0.00        | 0.00        | 1.06        | 5.20        | 1.34        | 3.07        | 3.81        | 10.02       | <b>1.12</b> |
| <b>Average (2000-2004)</b> | <b>0.00</b>      | <b>0.16</b> | <b>0.15</b> | <b>0.00</b> | <b>1.08</b> | <b>1.29</b> | <b>2.36</b> | <b>5.19</b> | <b>6.11</b> | <b>7.38</b> | <b>0.98</b> |
| <b>2005</b>                | 0.00             | 0.16        | 1.53        | 0.00        | 0.00        | 1.27        | 0.00        | 7.71        | 3.84        | 4.93        | <b>0.88</b> |
| <b>2006</b>                | 0.00             | 0.32        | 0.78        | 0.82        | 1.04        | 1.23        | 1.42        | 0.00        | 1.93        | 4.75        | <b>0.70</b> |
| <b>2007</b>                | 0.37             | 0.80        | 1.61        | 0.00        | 1.02        | 2.39        | 1.49        | 3.12        | 5.81        | 3.07        | <b>1.21</b> |
| <b>2008</b>                | 0.00             | 0.32        | 0.00        | 2.37        | 1.98        | 1.18        | 1.53        | 0.00        | 5.85        | 4.49        | <b>0.96</b> |
| <b>2009</b>                | 0.00             | 0.00        | 0.00        | 0.00        | 0.00        | 0.00        | 0.00        | 3.24        | 1.95        | 7.33        | <b>0.51</b> |
| <b>Average (2005-2009)</b> | <b>0.07</b>      | <b>0.32</b> | <b>0.78</b> | <b>0.64</b> | <b>0.81</b> | <b>1.21</b> | <b>0.89</b> | <b>2.81</b> | <b>3.88</b> | <b>4.91</b> | <b>0.85</b> |
| <b>2010</b>                | 0.00             | 0.17        | 0.86        | 1.63        | 0.92        | 1.17        | 0.00        | 5.00        | 3.92        | 12.97       | <b>1.31</b> |
| <b>2011</b>                | 0.00             | 0.20        | 0.00        | 0.00        | 0.00        | 1.20        | 0.00        | 3.50        | 5.72        | 2.69        | <b>0.64</b> |
| <b>2012</b>                | 0.00             | 0.20        | 0.00        | 0.00        | 0.00        | 0.00        | 2.79        | 1.83        | 1.92        | 5.26        | <b>0.65</b> |
| <b>2013</b>                | 0.00             | 0.21        | 1.98        | 0.00        | 0.00        | 0.00        | 1.38        | 3.73        | 0.00        | 3.87        | <b>0.66</b> |
| <b>Average (2010-2013)</b> | <b>0.00</b>      | <b>0.20</b> | <b>0.71</b> | <b>0.41</b> | <b>0.23</b> | <b>0.59</b> | <b>1.04</b> | <b>3.52</b> | <b>2.89</b> | <b>6.20</b> | <b>0.82</b> |
| <b>Average (2000-2013)</b> | <b>0.03</b>      | <b>0.23</b> | <b>0.54</b> | <b>0.34</b> | <b>0.74</b> | <b>1.06</b> | <b>1.46</b> | <b>3.86</b> | <b>4.39</b> | <b>6.16</b> | <b>0.89</b> |
| <b>Females</b>             |                  |             |             |             |             |             |             |             |             |             |             |
| <b>2000</b>                | 0.00             | 0.00        | 0.00        | 0.00        | 0.00        | 0.00        | 0.94        | 0.00        | 1.08        | 0.75        | <b>0.16</b> |
| <b>2001</b>                | 0.00             | 0.32        | 0.00        | 0.00        | 0.00        | 0.98        | 0.94        | 3.96        | 3.26        | 2.26        | <b>0.76</b> |
| <b>2002</b>                | 0.00             | 0.00        | 0.00        | 0.00        | 0.00        | 1.02        | 0.00        | 0.99        | 3.24        | 3.61        | <b>0.54</b> |
| <b>2003</b>                | 0.00             | 0.48        | 0.00        | 1.65        | 0.90        | 1.05        | 0.00        | 0.00        | 3.25        | 4.84        | <b>0.92</b> |
| <b>2004</b>                | 0.00             | 0.16        | 0.71        | 0.00        | 0.90        | 2.05        | 0.97        | 0.00        | 3.27        | 6.77        | <b>1.04</b> |

| Age groups                 | Age group, years |             |             |             |             |             |             |             |             |             | Overall     |
|----------------------------|------------------|-------------|-------------|-------------|-------------|-------------|-------------|-------------|-------------|-------------|-------------|
|                            | 0-14             | 15-39       | 40-44       | 45-49       | 50-54       | 55-59       | 60-64       | 65-69       | 70-74       | 75+         |             |
| <b>Average (2000-2004)</b> | <b>0.00</b>      | <b>0.19</b> | <b>0.14</b> | <b>0.33</b> | <b>0.36</b> | <b>1.02</b> | <b>0.57</b> | <b>0.99</b> | <b>2.82</b> | <b>3.65</b> | <b>0.68</b> |
| <b>2005</b>                | 0.36             | 0.00        | 0.00        | 0.76        | 0.00        | 0.99        | 3.97        | 2.98        | 2.19        | 2.68        | <b>0.88</b> |
| <b>2006</b>                | 0.00             | 0.16        | 0.75        | 0.00        | 0.00        | 0.00        | 1.02        | 0.00        | 4.37        | 1.95        | <b>0.55</b> |
| <b>2007</b>                | 0.00             | 0.00        | 1.53        | 0.72        | 0.87        | 1.88        | 1.06        | 1.00        | 2.18        | 3.17        | <b>0.83</b> |
| <b>2008</b>                | 0.00             | 0.33        | 0.00        | 0.72        | 0.00        | 0.93        | 0.00        | 3.02        | 2.19        | 5.55        | <b>1.00</b> |
| <b>2009</b>                | 0.00             | 0.00        | 0.80        | 0.00        | 0.81        | 1.86        | 3.22        | 1.03        | 1.09        | 2.41        | <b>0.73</b> |
| <b>Average (2005-2009)</b> | <b>0.07</b>      | <b>0.10</b> | <b>0.62</b> | <b>0.44</b> | <b>0.34</b> | <b>1.13</b> | <b>1.85</b> | <b>1.61</b> | <b>2.40</b> | <b>3.15</b> | <b>0.80</b> |
| <b>2010</b>                | 0.00             | 0.00        | 0.00        | 0.00        | 2.35        | 0.00        | 0.00        | 2.12        | 1.09        | 2.37        | <b>0.57</b> |
| <b>2011</b>                | 0.00             | 0.00        | 1.77        | 0.84        | 0.00        | 0.00        | 2.09        | 1.12        | 3.26        | 2.79        | <b>0.86</b> |
| <b>2012</b>                | 0.00             | 0.00        | 0.00        | 0.00        | 0.00        | 0.96        | 0.00        | 1.17        | 3.29        | 2.72        | <b>0.62</b> |
| <b>2013</b>                | 0.00             | 0.00        | 0.92        | 0.00        | 0.00        | 0.00        | 0.00        | 0.00        | 1.11        | 1.07        | <b>0.25</b> |
| <b>Average (2010-2013)</b> | <b>0.00</b>      | <b>0.00</b> | <b>0.67</b> | <b>0.21</b> | <b>0.59</b> | <b>0.24</b> | <b>0.52</b> | <b>1.10</b> | <b>2.19</b> | <b>2.24</b> | <b>0.58</b> |
| <b>Average (2000-2013)</b> | <b>0.03</b>      | <b>0.10</b> | <b>0.46</b> | <b>0.33</b> | <b>0.42</b> | <b>0.84</b> | <b>1.02</b> | <b>1.24</b> | <b>2.49</b> | <b>3.07</b> | <b>0.69</b> |

**Table S5.** Mortality Crude Rate of Chronic Myeloid Leukemia according to age group (per 100 000 per year) (5 age groups).

| Age groups            | Age group, years |             |             |             |             | Overall     |
|-----------------------|------------------|-------------|-------------|-------------|-------------|-------------|
|                       | 0-17             | 18-45       | 46-60       | 61-75       | 76+         |             |
| <b>All population</b> |                  |             |             |             |             |             |
| 2000                  | 0.00             | 0.00        | 0.17        | 1.05        | 1.87        | <b>0.26</b> |
| 2001                  | 0.12             | 0.14        | 0.51        | 4.84        | 2.95        | <b>0.98</b> |
| 2002                  | 0.00             | 0.14        | 0.51        | 2.31        | 5.08        | <b>0.72</b> |
| 2003                  | 0.00             | 0.35        | 0.67        | 3.36        | 6.47        | <b>1.07</b> |
| 2004                  | 0.00             | 0.28        | 1.32        | 2.11        | 7.90        | <b>1.08</b> |
| Average (2000-2004)   | <b>0.02</b>      | <b>0.18</b> | <b>0.64</b> | <b>2.73</b> | <b>4.85</b> | <b>0.82</b> |
| 2005                  | 0.14             | 0.21        | 0.65        | 3.20        | 3.63        | <b>0.88</b> |
| 2006                  | 0.00             | 0.36        | 0.47        | 1.73        | 2.51        | <b>0.62</b> |
| 2007                  | 0.15             | 0.72        | 0.93        | 2.19        | 3.42        | <b>1.01</b> |
| 2008                  | 0.15             | 0.29        | 1.06        | 2.00        | 5.69        | <b>0.98</b> |
| 2009                  | 0.00             | 0.07        | 0.74        | 1.57        | 3.71        | <b>0.63</b> |
| Average (2005-2009)   | <b>0.09</b>      | <b>0.33</b> | <b>0.77</b> | <b>2.14</b> | <b>3.79</b> | <b>0.82</b> |
| 2010                  | 0.16             | 0.15        | 0.90        | 1.81        | 5.81        | <b>0.91</b> |
| 2011                  | 0.00             | 0.26        | 0.62        | 2.49        | 2.13        | <b>0.76</b> |
| 2012                  | 0.00             | 0.09        | 0.16        | 1.82        | 3.74        | <b>0.64</b> |
| 2013                  | 0.00             | 0.36        | 0.00        | 0.91        | 2.10        | <b>0.44</b> |
| Average (2010-2013)   | <b>0.04</b>      | <b>0.22</b> | <b>0.42</b> | <b>1.76</b> | <b>3.45</b> | <b>0.69</b> |
| Average (2000-2013)   | <b>0.05</b>      | <b>0.25</b> | <b>0.62</b> | <b>2.24</b> | <b>4.07</b> | <b>0.78</b> |
| <b>Male</b>           |                  |             |             |             |             |             |
| 2000                  | 0.00             | 0.00        | 0.38        | 1.62        | 4.29        | <b>0.37</b> |
| 2001                  | 0.00             | 0.14        | 0.75        | 8.05        | 4.25        | <b>1.23</b> |
| 2002                  | 0.00             | 0.29        | 0.74        | 3.74        | 8.19        | <b>0.93</b> |
| 2003                  | 0.00             | 0.14        | 0.37        | 6.95        | 9.74        | <b>1.24</b> |
| 2004                  | 0.00             | 0.29        | 1.80        | 2.70        | 11.35       | <b>1.12</b> |
| Average (2000-2004)   | <b>0.00</b>      | <b>0.17</b> | <b>0.81</b> | <b>4.61</b> | <b>7.56</b> | <b>0.98</b> |
| 2005                  | 0.00             | 0.43        | 0.35        | 3.83        | 5.58        | <b>0.88</b> |
| 2006                  | 0.00             | 0.43        | 1.03        | 1.67        | 3.57        | <b>0.70</b> |
| 2007                  | 0.29             | 1.01        | 1.01        | 3.40        | 3.46        | <b>1.21</b> |
| 2008                  | 0.29             | 0.29        | 1.64        | 2.30        | 5.04        | <b>0.96</b> |
| 2009                  | 0.00             | 0.00        | 0.00        | 1.74        | 8.20        | <b>0.51</b> |
| Average (2005-2009)   | <b>0.12</b>      | <b>0.43</b> | <b>0.81</b> | <b>2.59</b> | <b>5.17</b> | <b>0.85</b> |
| 2010                  | 0.32             | 0.30        | 0.95        | 2.90        | 14.18       | <b>1.31</b> |
| 2011                  | 0.00             | 0.18        | 0.34        | 3.48        | 1.50        | <b>0.64</b> |
| 2012                  | 0.00             | 0.18        | 0.00        | 2.33        | 5.85        | <b>0.65</b> |
| 2013                  | 0.00             | 0.55        | 0.00        | 1.75        | 4.38        | <b>0.66</b> |
| Average (2010-2013)   | <b>0.08</b>      | <b>0.30</b> | <b>0.32</b> | <b>2.62</b> | <b>6.48</b> | <b>0.82</b> |
| Average (2000-2013)   | <b>0.06</b>      | <b>0.30</b> | <b>0.67</b> | <b>3.32</b> | <b>6.40</b> | <b>0.89</b> |
| <b>Female</b>         |                  |             |             |             |             |             |



| Age groups          | Age group, years |             |             |             |             | Overall     |
|---------------------|------------------|-------------|-------------|-------------|-------------|-------------|
|                     | 0-17             | 18-45       | 46-60       | 61-75       | 76+         |             |
| 2000                | 0.00             | 0.00        | 0.00        | 0.69        | 0.88        | <b>0.16</b> |
| 2001                | 0.24             | 0.14        | 0.31        | 2.77        | 2.45        | <b>0.76</b> |
| 2002                | 0.00             | 0.00        | 0.31        | 1.39        | 3.90        | <b>0.54</b> |
| 2003                | 0.00             | 0.56        | 0.93        | 1.04        | 5.22        | <b>0.92</b> |
| 2004                | 0.00             | 0.28        | 0.92        | 1.73        | 6.57        | <b>1.04</b> |
| Average (2000-2004) | <b>0.05</b>      | <b>0.20</b> | <b>0.49</b> | <b>1.52</b> | <b>3.80</b> | <b>0.68</b> |
| 2005                | 0.28             | 0.00        | 0.90        | 2.80        | 2.88        | <b>0.88</b> |
| 2006                | 0.00             | 0.29        | 0.00        | 1.77        | 2.10        | <b>0.55</b> |
| 2007                | 0.00             | 0.43        | 0.86        | 1.43        | 3.40        | <b>0.83</b> |
| 2008                | 0.00             | 0.29        | 0.56        | 1.82        | 5.95        | <b>1.00</b> |
| 2009                | 0.00             | 0.15        | 1.38        | 1.47        | 1.94        | <b>0.73</b> |
| Average (2005-2009) | <b>0.06</b>      | <b>0.23</b> | <b>0.74</b> | <b>1.86</b> | <b>3.25</b> | <b>0.80</b> |
| 2010                | 0.00             | 0.00        | 0.86        | 1.11        | 2.50        | <b>0.57</b> |
| 2011                | 0.00             | 0.35        | 0.87        | 1.86        | 2.38        | <b>0.86</b> |
| 2012                | 0.00             | 0.00        | 0.29        | 1.49        | 2.91        | <b>0.62</b> |
| 2013                | 0.00             | 0.18        | 0.00        | 0.37        | 1.18        | <b>0.25</b> |
| Average (2010-2013) | <b>0.00</b>      | <b>0.13</b> | <b>0.51</b> | <b>1.21</b> | <b>2.24</b> | <b>0.58</b> |
| Average (2000-2013) | <b>0.04</b>      | <b>0.19</b> | <b>0.58</b> | <b>1.55</b> | <b>3.16</b> | <b>0.69</b> |

Table S6. Mortality ASR (W) of Chronic Myeloid Leukemia (per 100 000 per year).

| Overall             | All population | Males       | Females     |
|---------------------|----------------|-------------|-------------|
| 2000                | 0.13           | 0.22        | 0.08        |
| 2001                | 0.55           | 0.74        | 0.44        |
| 2002                | 0.40           | 0.61        | 0.25        |
| 2003                | 0.64           | 0.76        | 0.59        |
| 2004                | 0.64           | 0.77        | 0.55        |
| Average (2000-2004) | <b>0.47</b>    | <b>0.62</b> | <b>0.38</b> |
| 2005                | 0.53           | 0.57        | 0.52        |
| 2006                | 0.40           | 0.51        | 0.31        |
| 2007                | 0.72           | 0.98        | 0.48        |
| 2008                | 0.60           | 0.68        | 0.54        |
| 2009                | 0.35           | 0.29        | 0.43        |
| Average (2005-2009) | <b>0.52</b>    | <b>0.61</b> | <b>0.46</b> |
| 2010                | 0.51           | 0.82        | 0.29        |
| 2011                | 0.42           | 0.40        | 0.46        |
| 2012                | 0.32           | 0.40        | 0.26        |
| 2013                | 0.28           | 0.47        | 0.13        |
| Average (2010-2013) | <b>0.38</b>    | <b>0.52</b> | <b>0.29</b> |
| Overall             | <b>0.46</b>    | <b>0.59</b> | <b>0.38</b> |

**Table S7.** Relative Survival Rate of Chronic Myeloid Leukemia during 2000-2013 according to age group (3 age groups).

| Population at 2000-2013 period |                |             |             |             |             |             |             |             |             |
|--------------------------------|----------------|-------------|-------------|-------------|-------------|-------------|-------------|-------------|-------------|
| Age group, years               | 1 year RS      |             |             |             |             |             |             |             |             |
|                                | All population |             |             | Males       |             |             | Females     |             |             |
|                                | RS             | 95% CI      |             | RS          | 95% CI      |             | RS          | 95% CI      |             |
| 0-17                           | 0.80           | 0.41        | 0.95        | 0.67        | 0.19        | 0.91        | 1.00        | -           | -           |
| 18-60                          | 0.91           | 0.87        | 0.94        | 0.90        | 0.84        | 0.94        | 0.92        | 0.86        | 0.96        |
| 61+                            | 0.56           | 0.50        | 0.61        | 0.54        | 0.45        | 0.61        | 0.58        | 0.49        | 0.65        |
| <b>Overall</b>                 | <b>0.72</b>    | <b>0.68</b> | <b>0.76</b> | <b>0.71</b> | <b>0.65</b> | <b>0.76</b> | <b>0.74</b> | <b>0.68</b> | <b>0.79</b> |
| 5 year RS                      |                |             |             |             |             |             |             |             |             |
| 0-17                           | 0.48           | 0.16        | 0.75        | 0.48        | 0.09        | 0.80        | 0.50        | 0.06        | 0.85        |
| 18-60                          | 0.73           | 0.67        | 0.79        | 0.74        | 0.65        | 0.82        | 0.73        | 0.63        | 0.80        |
| 61+                            | 0.27           | 0.21        | 0.34        | 0.29        | 0.21        | 0.39        | 0.26        | 0.18        | 0.35        |
| <b>Overall</b>                 | <b>0.49</b>    | <b>0.45</b> | <b>0.54</b> | <b>0.51</b> | <b>0.44</b> | <b>0.57</b> | <b>0.48</b> | <b>0.41</b> | <b>0.55</b> |
| 10 year RS                     |                |             |             |             |             |             |             |             |             |
| 0-17                           | -              | -           | -           | -           | -           | -           | -           | -           | -           |
| 18-60                          | 0.58           | 0.49        | 0.66        | 0.60        | 0.47        | 0.71        | 0.56        | 0.44        | 0.68        |
| 61+                            | 0.14           | 0.07        | 0.23        | 0.07        | 0.01        | 0.26        | 0.17        | 0.09        | 0.27        |
| <b>Overall</b>                 | <b>0.36</b>    | <b>0.31</b> | <b>0.42</b> | <b>0.37</b> | <b>0.28</b> | <b>0.46</b> | <b>0.36</b> | <b>0.28</b> | <b>0.44</b> |
| Population at 2000-2004 period |                |             |             |             |             |             |             |             |             |
| Age groups                     | 1 year RS      |             |             |             |             |             |             |             |             |
|                                | All population |             |             | Males       |             |             | Females     |             |             |
|                                | RS             | 95% CI      |             | RS          | 95% CI      |             | RS          | 95% CI      |             |
| 0-17 years                     | 1.00           | -           | -           | -           | -           | -           | 1.00        | -           | -           |
| 18-60 years                    | 0.88           | 0.80        | 0.93        | 0.86        | 0.74        | 0.93        | 0.90        | 0.77        | 0.96        |
| 61+ years                      | 0.40           | 0.32        | 0.48        | 0.35        | 0.24        | 0.46        | 0.46        | 0.34        | 0.57        |
| <b>Overall</b>                 | <b>0.61</b>    | <b>0.55</b> | <b>0.67</b> | <b>0.58</b> | <b>0.49</b> | <b>0.66</b> | <b>0.65</b> | <b>0.55</b> | <b>0.73</b> |
| 5 year RS                      |                |             |             |             |             |             |             |             |             |
| 0-17 years                     | -              | -           | -           | -           | -           | -           | -           | -           | -           |
| 18-60 years                    | 0.58           | 0.47        | 0.67        | 0.55        | 0.41        | 0.68        | 0.60        | 0.45        | 0.73        |
| 61+ years                      | 0.14           | 0.09        | 0.22        | 0.12        | 0.05        | 0.23        | 0.17        | 0.09        | 0.28        |
| <b>Overall</b>                 | <b>0.33</b>    | <b>0.27</b> | <b>0.40</b> | <b>0.32</b> | <b>0.24</b> | <b>0.41</b> | <b>0.35</b> | <b>0.26</b> | <b>0.44</b> |
| Population at 2005-2009 period |                |             |             |             |             |             |             |             |             |
| Age groups                     | 1 year RS      |             |             |             |             |             |             |             |             |
|                                | All population |             |             | Males       |             |             | Females     |             |             |
|                                | RS             | 95% CI      |             | RS          | 95% CI      |             | RS          | 95% CI      |             |
| 0-17 years                     | 0.60           | 0.13        | 0.88        | 0.50        | 0.06        | 0.85        | 1.00        | -           | -           |
| 18-60 years                    | 0.92           | 0.84        | 0.96        | 0.91        | 0.78        | 0.97        | 0.94        | 0.81        | 0.98        |
| 61+ years                      | 0.71           | 0.61        | 0.80        | 0.71        | 0.56        | 0.83        | 0.72        | 0.57        | 0.82        |
| <b>Overall</b>                 | <b>0.81</b>    | <b>0.74</b> | <b>0.86</b> | <b>0.79</b> | <b>0.70</b> | <b>0.87</b> | <b>0.82</b> | <b>0.73</b> | <b>0.89</b> |
| 5 year RS                      |                |             |             |             |             |             |             |             |             |
| 0-17 years                     | 0.40           | 0.05        | 0.76        | 0.25        | 0.01        | 0.67        | 1.00        | -           | -           |
| 18-60 years                    | 0.81           | 0.71        | 0.88        | 0.84        | 0.69        | 0.93        | 0.78        | 0.62        | 0.88        |
| 61+ years                      | 0.37           | 0.26        | 0.48        | 0.40        | 0.25        | 0.57        | 0.34        | 0.21        | 0.48        |
| <b>Overall</b>                 | <b>0.58</b>    | <b>0.50</b> | <b>0.65</b> | <b>0.61</b> | <b>0.49</b> | <b>0.71</b> | <b>0.55</b> | <b>0.44</b> | <b>0.65</b> |
| Population at 2010-2013 period |                |             |             |             |             |             |             |             |             |
| Age groups                     | 1 year RS      |             |             |             |             |             |             |             |             |
|                                | All population |             |             | Males       |             |             | Females     |             |             |
|                                | RS             | 95% CI      |             | RS          | 95% CI      |             | RS          | 95% CI      |             |
| 0-17 years                     | 1.00           | -           | -           | 1.00        | -           | -           | 1.00        | -           | -           |
| 18-60 years                    | 0.95           | 0.86        | 0.98        | 0.98        | 0.81        | 1.00        | 0.92        | 0.77        | 0.98        |

|                  |             |             |             |             |             |             |             |             |             |
|------------------|-------------|-------------|-------------|-------------|-------------|-------------|-------------|-------------|-------------|
| 61+ years        | 0.65        | 0.50        | 0.77        | 0.69        | 0.48        | 0.84        | 0.60        | 0.36        | 0.78        |
| <b>Overall</b>   | <b>0.83</b> | <b>0.74</b> | <b>0.89</b> | <b>0.85</b> | <b>0.72</b> | <b>0.93</b> | <b>0.80</b> | <b>0.67</b> | <b>0.89</b> |
| <b>5 year RS</b> |             |             |             |             |             |             |             |             |             |
| 0-17 years       | -           | -           | -           | -           | -           | -           | -           | -           | -           |
| 18-60 years      | -           | -           | -           | -           | -           | -           | -           | -           | -           |
| 61+ years        | -           | -           | -           | -           | -           | -           | -           | -           | -           |
| <b>Overall</b>   | -           | -           | -           | -           | -           | -           | -           | -           | -           |

**Table S8.** Kaplan–Meier analysis of Chronic Myeloid Leukemia.

| <b>All patients</b>              |              |                 |                            |             |
|----------------------------------|--------------|-----------------|----------------------------|-------------|
| Period                           | No. of cases | Median survival | 95% CI for median survival |             |
|                                  |              |                 | Lower Bound                | Upper Bound |
| 2000-2004                        | 263          | 21              | 14                         | 28          |
| 2005-2009                        | 212          | 60              | 32                         | 88          |
| 2010-2013                        | 126          | N/R             | N/R                        | N/R         |
| <b>0-17 year old patients</b>    |              |                 |                            |             |
| Period                           | No. of cases | Median survival | 95% CI for median survival |             |
|                                  |              |                 | Lower Bound                | Upper Bound |
| 2000-2004                        | 2            | 16              | 4                          | 28          |
| 2005-2009                        | 5            | 17              | 2                          | 32          |
| 2010-2013                        | 3            | N/R             | N/R                        | N/R         |
| <b>18-60 year old patients</b>   |              |                 |                            |             |
| Period                           | No. of cases | Median survival | 95% CI for median survival |             |
|                                  |              |                 | Lower Bound                | Upper Bound |
| 2000-2004                        | 107          | 69              | 46                         | 92          |
| 2005-2009                        | 91           | N/R             | N/R                        | N/R         |
| 2010-2013                        | 66           | N/R             | N/R                        | N/R         |
| <b>Over 60 year old patients</b> |              |                 |                            |             |
| Period                           | No. of cases | Median survival | 95% CI for median survival |             |
|                                  |              |                 | Lower Bound                | Upper Bound |
| 2000-2004                        | 154          | 7               | 4                          | 10          |
| 2005-2009                        | 116          | 28              | 16                         | 40          |
| 2010-2013                        | 57           | 29              | N/R                        | N/R         |

**Table S9.** ECOG performance score of CML patients presenting during 2010-2013 period

| Age          | ECOG            |                 |               |               |               | Total            |
|--------------|-----------------|-----------------|---------------|---------------|---------------|------------------|
|              | 0               | 1               | 2             | 3             | 4             |                  |
| 0-44         | 19 (63%)        | 11 (37%)        | 0 (0%)        | 0 (0%)        | 0 (0%)        | <b>30 (33%)</b>  |
| 45-54        | 10 (67%)        | 2 (13%)         | 1 (7%)        | 2 (13%)       | 0 (0%)        | <b>15 (16%)</b>  |
| 55-64        | 13 (54%)        | 8 (33%)         | 2 (8%)        | 1 (4%)        | 0 (0%)        | <b>24 (26%)</b>  |
| 65-74        | 4 (29%)         | 9 (64%)         | 1 (7%)        | 0 (0%)        | 0 (0%)        | <b>14 (15%)</b>  |
| 75+          | 1 (11%)         | 1 (11%)         | 2 (22%)       | 3 (33%)       | 2 (22%)       | <b>9 (10%)</b>   |
| <b>Total</b> | <b>47 (51%)</b> | <b>31 (34%)</b> | <b>6 (7%)</b> | <b>6 (7%)</b> | <b>2 (2%)</b> | <b>92 (100%)</b> |

**Figure S1.** Kaplan–Meier diagram of Chronic Myeloid Leukemia: All age groups.

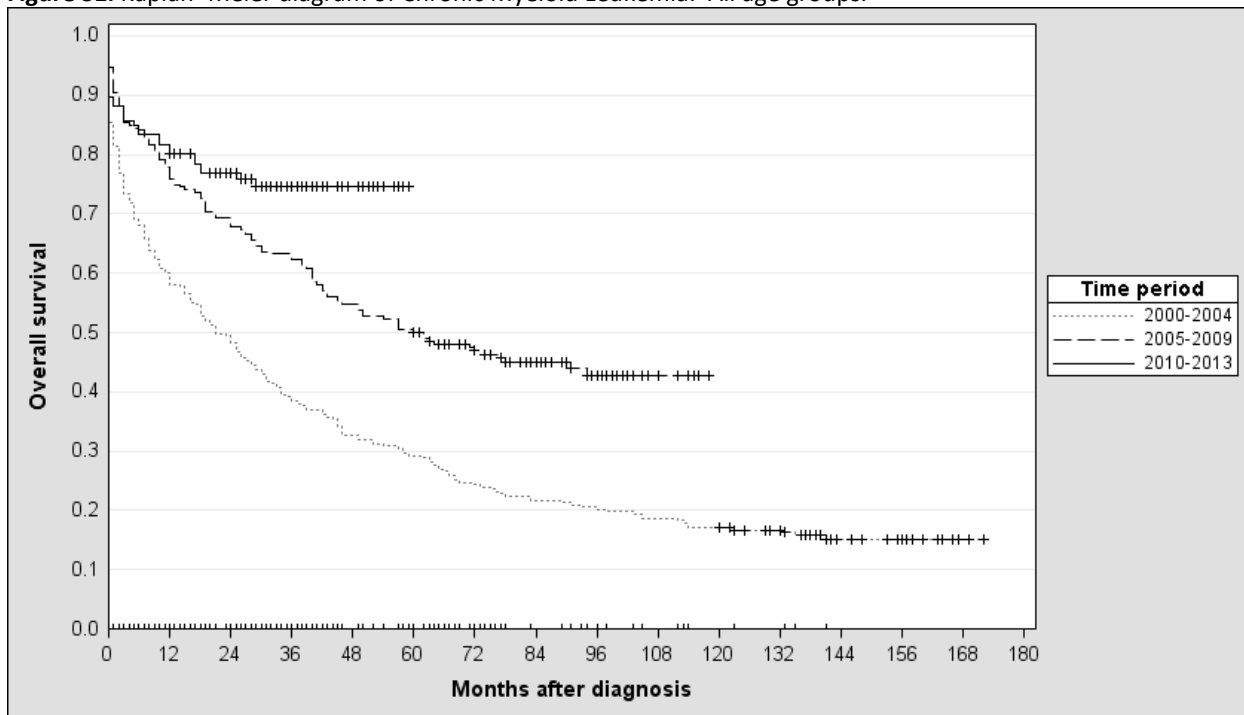

The overall survival comparison (log rank test):

- $p < 0.001$ : 2000-2004 vs. 2005-2009
- $p < 0.001$ : 2000-2004 vs. 2010-2013
- $p = 0.957$ : 2005-2009 vs. 2010-2013

**Figure S2.** Kaplan–Meier diagram of Chronic Myeloid Leukemia: 18-60 year old patients.

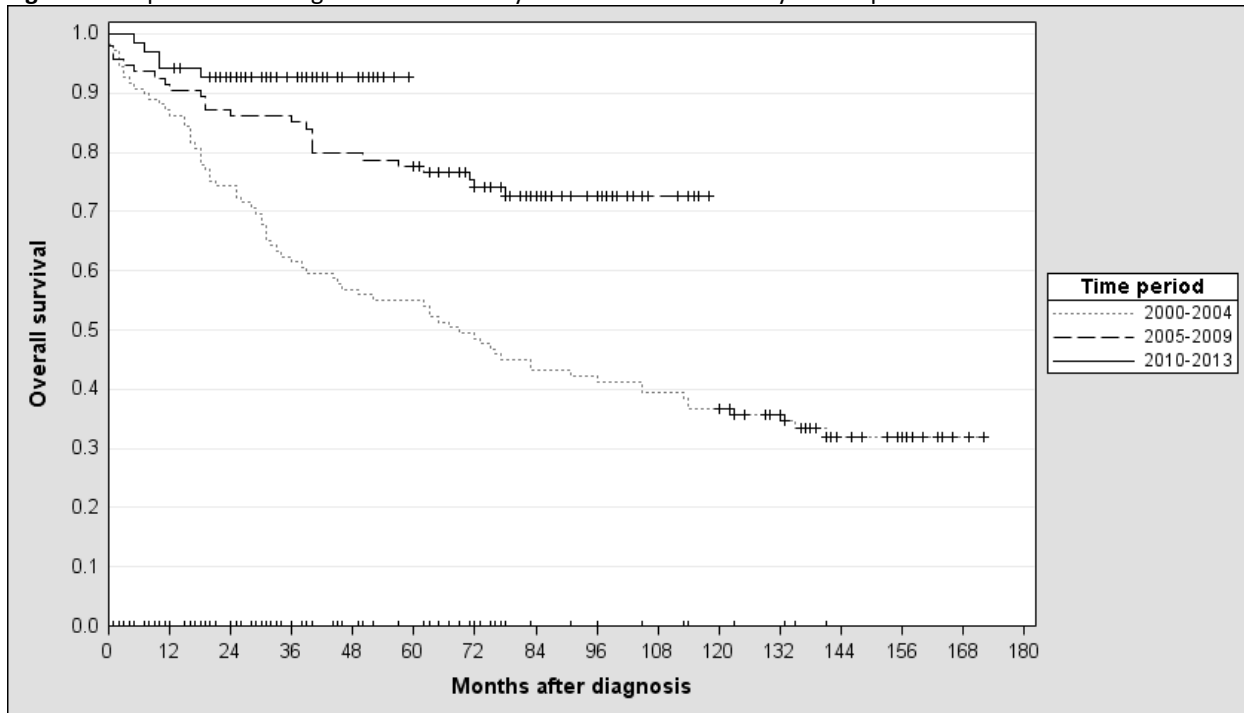

The overall survival comparison (log rank test):

- $p < 0.001$ : 2000-2004 vs. 2005-2009
- $p < 0.001$ : 2000-2004 vs. 2010-2013
- $p = 0.755$ : 2005-2009 vs. 2010-2013

**Figure S3.** Kaplan–Meier diagram of Chronic Myeloid Leukemia: >60 year old patients.

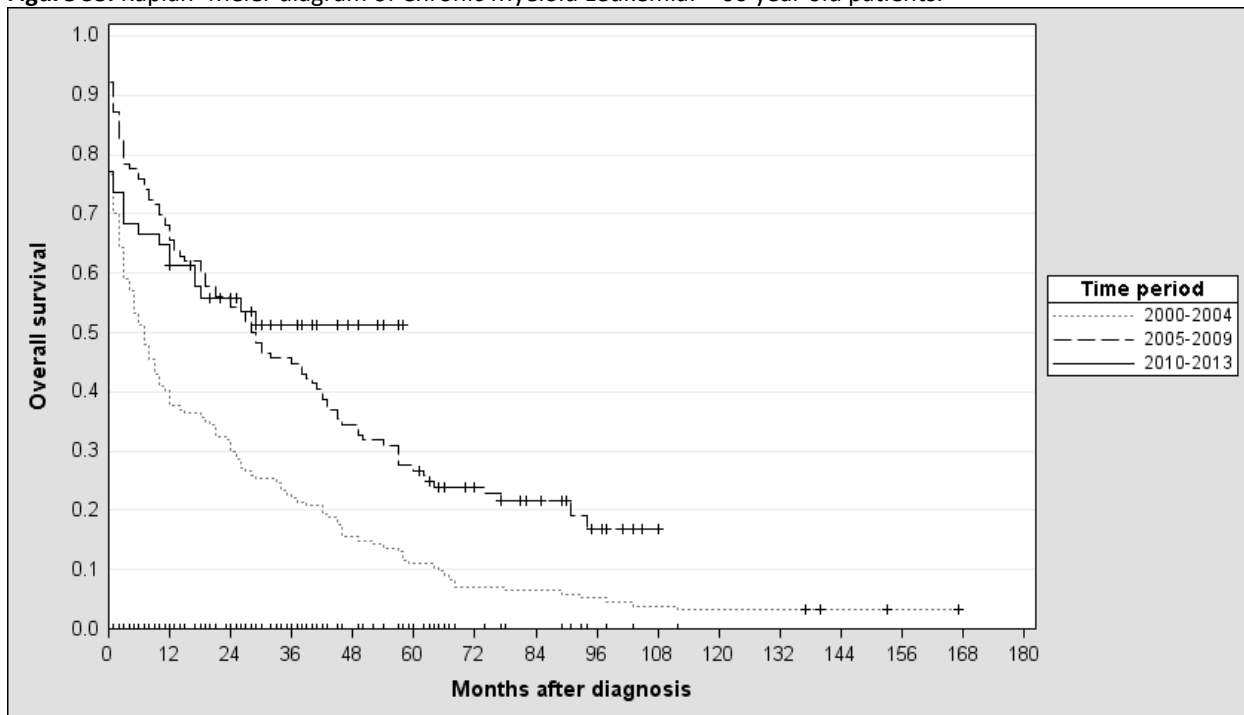

The overall survival comparison (log rank test):

- $p < 0.001$ : 2000-2004 vs. 2005-2009
- $p < 0.001$ : 2000-2004 vs. 2010-2013
- $p = 0.308$ : 2005-2009 vs. 2010-2013

## References

1. Dawson, B. and R.G. Trapp, *Basic & clinical biostatistics*. 2001, Monterey: McGraw-Hill.
2. Boniol, M. and M. Heanue, *Age-standardisation and denominators*, in *Cancer incidence in five continents*, M.P. Curado and e. al., Editors. 2008. p. 1-837.
3. *United Nations. World Population Prospects, the 2010 Revision*. 2010; Available from: <http://esa.un.org/wpp/Excel-Data/population.htm>.
4. Dickman, P.W., et al., *Regression models for relative survival*. *Stat Med*, 2004. **23**(1): p. 51-64.
